1 ***Brucella abortus* induces a Warburg shift in host metabolism that enhances**  
2 **intracellular replication of the pathogen**

3

4

5 Daniel M. Czyż<sup>a,b</sup>, Jonathan Willett<sup>a,b</sup>, Sean Crosson<sup>a,b,c#</sup>

6

7 Howard Taylor Ricketts Laboratory, University of Chicago, Argonne National  
8 Laboratory, Lemont, Illinois, USA<sup>a</sup>; Department of Biochemistry and Molecular Biology,  
9 University of Chicago, Chicago, Illinois, USA<sup>b</sup>; Department of Microbiology, University of  
10 Chicago, Chicago, Illinois, USA<sup>c</sup>

11

12 Running title: *Brucella abortus* infection and host cell metabolism

13

14 #Address correspondence to Sean Crosson, [scrosson@uchicago.edu](mailto:scrosson@uchicago.edu)

15 **KEYWORDS:** Metabolism, Warburg effect, lactate, *Brucella*, therapeutics

16 **ABSTRACT**

17 Intracellular bacterial pathogens exploit host cell resources to replicate and survive  
18 inside the host. Targeting these host systems is one promising approach to developing  
19 novel antimicrobials for intracellular infections. We show that human macrophage-like  
20 cells infected with *Brucella abortus* undergo a metabolic shift characterized by  
21 attenuated tricarboxylic acid cycle metabolism, altered mitochondrial morphology and  
22 increased lactate production. This shift to an aerobic glycolytic state resembles the  
23 Warburg effect, a change in energy production that is well-described in cancer cells,  
24 and also occurs in activated inflammatory cells. *B. abortus* efficiently uses lactic acid as  
25 a carbon and energy source and requires the ability to metabolize lactate for normal  
26 replication in human macrophage-like cells. We further demonstrate that chemical  
27 inhibitors of host glycolysis and lactate production do not affect *in vitro* growth of *B.*  
28 *abortus* in axenic culture, but decrease its replication in the intracellular niche. Our data  
29 support a model in which infection shifts host metabolism to a Warburg-like state, and  
30 *B. abortus* uses this change in metabolism to promote intracellular replication.  
31 Pharmacological perturbation of these features of host cell metabolism may be a useful  
32 strategy to inhibit infection by intracellular pathogens.

33 **IMPORTANCE**

34 *Brucella* spp. are intracellular pathogens that cause disease in a range of mammals,  
35 including livestock. Transmission from livestock to humans is common and can lead to  
36 chronic human disease. Human macrophage-like cells infected with *Brucella abortus*  
37 undergo a Warburg-like metabolic shift to an aerobic glycolytic state that produces lactic  
38 acid, which *B. abortus* can use as a carbon and energy source to promote its growth.

39 We provide evidence that the pathogen exploits this change in host metabolism to  
40 replicate in the intracellular niche. Drugs that target this feature of host cell metabolism  
41 inhibit intracellular replication of *B. abortus* and may be broadly useful therapeutics for  
42 intracellular infections.

## 43 INTRODUCTION

44 Macrophages can be activated by pathogen-associated pro-inflammatory  
45 molecules such as lipopolysaccharide (LPS). Classically activated (i.e. M1)  
46 macrophages undergo a major metabolic shift in which the tricarboxylic acid (TCA)  
47 cycle is downregulated, and energy production transitions from oxidative  
48 phosphorylation to the less efficient process of aerobic glycolysis (1, 2). This change in  
49 metabolism, known as the Warburg effect (3), is a well-described metabolic feature of  
50 cancer cells (4). Increased glucose consumption through glycolysis is thought to  
51 increase adenosine triphosphate (ATP) levels; a corresponding increase in pentose  
52 phosphate pathway activity generates nicotinamide adenine dinucleotide phosphate  
53 (NADPH), which is subsequently used by NADPH oxidases to generate reactive oxygen  
54 species (ROS) (5). This metabolic shift is important in enabling cells to launch general  
55 antimicrobial defense mechanisms by increasing concentrations of ROS and reactive  
56 nitrogen intermediates (6).

57 The intracellular pathogen *Brucella abortus* invades host cells and is trafficked to  
58 a compartment known as the Brucella containing vacuole, where it replicates. To  
59 successfully find its way to this niche, *B. abortus* must avoid numerous chemical insults  
60 by the host cell and adapt to the nutrient resources available within the host. The

61 mechanisms by which *B. abortus* evades host defenses and takes advantage of host  
62 metabolic responses remain understudied. *B. abortus* induces a Warburg-like effect in  
63 mammalian host cells. We demonstrate that this metabolic shift is advantageous for *B.*  
64 *abortus* replication, and that chemical inhibition of Warburg metabolism in macrophage-  
65 like cells attenuates intracellular replication of *B. abortus*. Thus, *B. abortus* exploits an  
66 innate immune metabolic response to support infection.

67

## 68 **RESULTS**

### 69 ***Brucella abortus* infection of human macrophage-like cells disrupts mitochondrial** 70 **function and morphology**

71 To characterize the effect of intracellular colonization by *B. abortus* on human  
72 cell metabolism, we employed mammalian cell phenotype microarrays (PM) to measure  
73 respiration in terminally differentiated, metabolically active THP-1 cells. These cells  
74 were cultivated in minimal essential medium in the presence of central metabolic  
75 substrates specifically selected to measure mitochondrial function. Three of the  
76 substrates,  $\alpha$ -ketoglutaric acid,  $\beta$ -hydroxybutyric acid, and pyruvic acid are metabolized  
77 in mitochondria. We assessed the respiration of the human cells solely utilizing the  
78 provided substrate as a primary energy source by colorimetrically measuring reduction  
79 of a redox indicator dye. This assay allows us to assess the cells' ability to metabolize  
80 substrates across different molecular pathways, and thus provides a measurement of  
81 metabolic pathway activity upon infection (Figure 1A). We infected the cells with *B.*  
82 *abortus* at increasing multiplicities of infection (MOI). To eliminate the possibility that

83 changes in the metabolic activity of human cells are caused by *Brucella*-induced cell  
84 death, we removed medium containing mitochondrial substrates and replaced it with a  
85 regular growth medium containing glucose, followed by assessment of cell viability  
86 using the MTT (3-(4,5-dimethylthiazol-2-yl)-2,5-diphenyltetrazolium bromide) assay. The  
87 number of viable cells remained the same at different *Brucella* MOI (Figure 1B). Naïve  
88 cells utilized all of the mitochondrial substrates (Figure 1C), but their ability to utilize  
89 those substrates decreased in cells infected with *B. abortus* (Figure 1D). This decrease  
90 was dependent on MOI (Figures 1A). *Brucella*-infected cells, unlike with all other  
91 substrates, continued to utilize glucose (Figure 1C–D). In fact, infected cells increased  
92 glucose consumption with increasing MOI (Fig. S1).

93 The marked inhibition of mitochondrial substrate utilization suggests that  
94 intracellular Brucellae diminish mitochondrial function. Parasites (7), viruses (8), and  
95 intracellular bacterial pathogens including *B. melitensis* (9) and *Listeria monocytogenes*  
96 (10) perturb mitochondrial function in host cells. To obtain additional evidence that  
97 mitochondrial function is disrupted during *B. abortus* infection, we examined  
98 mitochondrial morphology in uninfected and infected HeLa cells (because THP-1 cells  
99 are not amenable to mitochondrial staining or imaging). Disruptions of mitochondrial  
100 structure were observed in HeLa cells with detectable *B. abortus*, whereas uninfected  
101 cells in the same field of view had normal cellular and mitochondrial morphology (Figure  
102 2). Using an MTT cell viability assay we detected no loss in host viability with increasing  
103 MOI within the same timeframe (Figure 1B). Therefore, it is unlikely that the  
104 mitochondrial disruption observed by fluorescence microscopy results from host cell  
105 death.

106 Most amino acids can be metabolized to enter the TCA cycle through anaplerotic  
107 reactions (11). To determine whether the observed *B. abortus*-mediated disruption of  
108 host mitochondrial function directly affects amino acid metabolism, we assessed the  
109 effect of infection on the host's ability to utilize amino acids as a carbon source. While  
110 glucose metabolism was unaffected, infected cells could not metabolize any of the  
111 amino acids known to enter the TCA cycle (Figure 3). Together, the results of these  
112 experiments are consistent with a model in which infection of human macrophages with  
113 *B. abortus* results in major metabolic changes that are linked to disruption of  
114 mitochondrial function.

115

### 116 ***Brucella*-dependent induction of lactic acid production in human cells**

117 Macrophages and dendritic cells are central to innate immunity. Upon activation, they  
118 can undergo a shift in energy metabolism by shutting down oxidative phosphorylation  
119 and increasing the rate of aerobic glycolysis in a process known as the Warburg effect  
120 (3). A hallmark of this effect is production of lactic acid in the presence of oxygen. An  
121 increase in lactate production in non-polarized macrophages infected with *Brucella* spp.  
122 has been previously noted (12). To further validate that THP-1 infected with *B. abortus*-  
123 are shifted toward a Warburg-like state, we measured the production of lactic acid in  
124 host cells as a function of increasing MOI. THP-1 cells increase lactic acid production in  
125 an MOI-dependent manner (Figure 4A). These results, together with the data presented  
126 in Figures 1-3 support a model in which *Brucella* promotes a Warburg-like shift in host  
127 cell metabolism by disrupting mitochondrial function.

128

129 ***Brucella abortus* lactate dehydrogenase is required for proper intracellular**  
130 **replication**

131 *Brucella* and *Salmonella* both replicate intracellularly and can persist in the host for long  
132 periods by shifting host metabolism to make glucose more available (12-14). We  
133 measured the growth of *B. abortus* on two preferred substrates, glucose and erythritol,  
134 and compared these data to growth on lactic acid. *B. abortus* grows on lactic acid as a  
135 sole carbon and energy source as well as it does on glucose or erythritol in standing  
136 culture *in vitro* (Figure 4B). We postulated that, during infection, *B. abortus* may exploit  
137 the Warburg-type shift in host metabolism by utilizing lactic acid as a carbon and energy  
138 source.

139 To define a genetic determinant of *B. abortus* lactic acid metabolism, we  
140 engineered a strain harboring an in-frame deletion of the gene encoding L-lactate  
141 dehydrogenase (LDH), *Bab2\_0315* ( $\Delta$ *lldD*). To determine whether *lldD* deletion affects  
142 utilization of other carbon sources, we used PM to compare the metabolic activity of  
143  $\Delta$ *lldD* to wild type (WT), and found that utilization of L-lactic acid was the most  
144 statistically significant loss-of-function phenotype (Figure 5A). WT *B. abortus* exhibited  
145 robust growth on lactic acid as a carbon and energy source, but  $\Delta$ *lldD* did not grow in  
146 this condition (Figure 5B). The  $\Delta$ *lldD* mutant had no apparent growth defect in *Brucella*  
147 broth supplemented with glucose (Figure 5C), but the numbers of colony forming units  
148 (CFU) of  $\Delta$ *lldD* were significantly reduced in THP-1 macrophages relative to WT at the  
149 48-hour time point (Figure 5D). Complementation of the mutation by introduction of *lldD*

150 at its native locus rescued the THP-1 growth/replication defect. Together, our results  
151 indicate that, upon infection, human cells increase lactic acid production and provide an  
152 advantage to intracellular *B. abortus*, which can utilize host lactic acid as a carbon and  
153 energy source.

154

155 **Small-molecule glycolysis inhibitors inhibit intracellular replication of *Brucella***  
156 ***abortus* but do not inhibit axenic growth**

157 Identification of pathogen-induced changes in host metabolism offers new avenues for  
158 the development of anti-infectives. Since *Brucella*-infected cells exhibited attenuated  
159 mitochondrial function and increased glycolysis, we used small-molecule inhibitors of  
160 glucose metabolism (Figure 6A) to determine whether inhibition of the host glycolytic  
161 pathway affected intracellular growth/replication of *B. abortus*. We tested: 3-  
162 bromopuruvic acid (3-BPA), an inhibitor of energy metabolism that completely  
163 eradicated cancer in animal models with no apparent cytotoxicity (15, 16); methyl 1-  
164 hydroxy-6-phenyl-4-(trifluoromethyl)-1H-indole-2-carboxylate (NHI-2), a potent  
165 anticancer inhibitor of lactate dehydrogenase A (LDH-A) (17, 18); and 2-deoxy-D-  
166 glucose (2-dG), a non-metabolizable homolog of D-glucose that slows glycolysis (19).

167 We counted *B. abortus* cells located inside THP-1 cells treated with each of  
168 these anti-metabolic compounds at various concentrations. Since some of these  
169 compounds may be toxic to cells at the tested concentrations, results were expressed  
170 as the number of *Brucella* per THP-1 nucleus; hence, the data represent bacterial



171 counts in live cells only. Each anti-metabolic drug significantly inhibited  
172 growth/replication of intracellular *Brucella* in live cells (Figure 6B).

173 To determine whether the antimicrobial activity of these compounds coincides  
174 with their cytotoxicity to human cells, we assessed their cytotoxicity using an XTT cell  
175 viability assay. As expected, each metabolic inhibitor was cytotoxic at higher  
176 concentrations. Treatment of THP-1 cells with 3-BPA, the most potent compound,  
177 inhibited *Brucella* infection at non-cytotoxic concentrations. NHI-2 and 2-dG were less  
178 potent, but effectively inhibited growth/replication of intracellular *Brucella* (Figure 6C).  
179 Both 3-BPA and NHI-2 significantly inhibited intracellular *Brucella* over a range of  
180 concentrations that did not affect host cell viability.

181 Finally, to determine whether the antimicrobial effect of these compounds occurs  
182 by host targeting, or whether they also directly inhibit bacterial growth, we measured  
183 growth and viability of *B. abortus* in axenic culture in the presence of 3-BPA, NHI-2, and  
184 2-dG. Neither 3-BPA nor NHI-2 affected growth and viability of *Brucella* in axenic  
185 medium, though 2-dG exhibited an inhibitory effect at higher concentrations ( $\geq 50$  mM).

186 These data support a model in which inhibition of host glycolysis and lactate  
187 production with 3-BPA and NHI-2 inhibits intracellular *B. abortus* replication without  
188 directly targeting *B. abortus* growth (Figure 6D). Together, these results demonstrate  
189 that infection-induced changes in host central metabolic pathways are required for  
190 proper growth/replication of intracellular *B. abortus*. Inhibition of the glycolytic pathway  
191 with host-targeting anti-metabolic compounds provides an effective means to decrease  
192 intracellular bacterial load without directly targeting the bacterium (Figure 6E).

193

## 194 **DISCUSSION**

195 We have identified metabolic changes in host cells upon exposure to an intracellular  
196 bacterial pathogen, *B. abortus*. Intracellular *B. abortus* perturb the morphology and  
197 function of host mitochondria, as characterized by loss of the ability to utilize  
198 mitochondrial substrates (Figure 1 and 2). The host metabolic effects we observed upon  
199 *B. abortus* infection resemble the effect of adding mitochondrial inhibitors (20), and are  
200 consistent with the previously reported downregulation of mitochondrion-associated  
201 gene expression in macrophages infected with *B. melitensis* (21). Many bacteria are  
202 known to target host mitochondria (22), but only a few species have been reported to  
203 disrupt mitochondrial morphology (9, 10, 23). The structures of mitochondria observed  
204 in our study resemble those of cells treated with uncouplers in combination with a  
205 respiration inhibitor; though this treatment resulted in energy deprivation and  
206 aggregation of mitochondria, the cells remained viable (24).

207 Intracellular pathogens compete with the host cell for available nutrients,  
208 including central metabolites and amino acids (25). As demonstrated using Biolog  
209 mammalian PM, THP-1 cells utilized amino acids as an energy source, but this is  
210 inhibited by *B. abortus* infection (Figure 3). The inability of infected cells to utilize amino  
211 acids suggests that either intracellular Brucellae compete for the pool of available amino  
212 acids, or the cells cease these catabolic reactions because of a change in mitochondrial  
213 (or other) physiology. Inhibiting the TCA cycle and increasing glucose metabolism can  
214 allow cells to rapidly generate the biomass required for cancer growth. Analogously,

215 induction of a Warburg-like state upon *B. abortus* infection may enable synthesis of  
216 building blocks required for intracellular bacterial growth.

217 Intracellular pathogens rely on host resources for survival and replication. It is  
218 therefore not surprising that other species of bacteria also affect host metabolism upon  
219 infection. For example, *Mycobacterium tuberculosis* enhances glycolysis in THP-1 cells  
220 (26). Early studies of the infection-induced changes in host metabolism showed that  
221 cells infected with *Chlamydia* increase their utilization of glucose through glycolysis and  
222 increase lactate production (27). Other pathogens, including the parasite *Plasmodium*  
223 *falciparum* (28), and Mayaro virus (29), also induce similar changes in host metabolism.  
224 Because the metabolic changes observed in these hosts are induced upon exposure to  
225 various stimuli, it is unlikely that the changes observed in our study are specifically  
226 induced by Brucellae.

227 Erythritol and glucose are preferred energy sources for *Brucella* (30), and our  
228 results show that, in axenic culture, *Brucella* can utilize lactate as efficiently as erythritol  
229 or glucose (Figure 4). Hence, we hypothesized that intracellular Brucellae can use  
230 abundant host lactate as an energy source, which would enable successful intracellular  
231 colonization and replication. We took two approaches to test whether host lactate  
232 affects intracellular growth. First, we created a lactate dehydrogenase knockout strain  
233  $\Delta lldD$ , which is unable to utilize lactate in axenic culture (Figure 5A-B). While  $\Delta lldD$   
234 showed no growth defects across a range of axenic media, its intracellular  
235 replication/survival was attenuated by ~1 log after 48 h in host THP-1 cells (Figure 5D).  
236 This suggests that the ability to utilize lactate is necessary for proper replication in the

237 intracellular niche. We note there are parallels between *B. abortus* pathogenicity and  
238 that of intracellular *Neisseria* spp., which is affected by host lactic acid (31). In the  
239 second approach, we targeted host lactate synthesis using the small molecule inhibitors  
240 NHI-2, 3-BPA, and 2-dG, which decrease lactate levels and inhibit aerobic glycolysis  
241 (17, 18, 32, 33). Each of these metabolic inhibitors decreased intracellular growth  
242 and/or replication of *Brucella* (Figure 6). Each of these compounds is known for its  
243 anticancer properties, but their anti-infective properties were not previously reported.  
244 Collectively, the data presented in this study support a model in which intracellular *B.*  
245 *abortus* exploits host metabolic pathways (Figure 7). Hence, the host anti-metabolic  
246 compounds identified here and in previous studies (34) may provide a novel therapeutic  
247 approach to treat *B. abortus* and other bacterial infections that rely on host metabolic  
248 intermediates.

249

## 250 **MATERIALS AND METHODS**

### 251 **Bacterial strains**

252 All studies on live *B. abortus* strain 2308 were conducted at Biosafety Level 3 (BSL3) at  
253 the Howard Taylor Ricketts Regional Biocontainment Laboratory, University of Chicago,  
254 according to US Federal Select Agent Program guidelines. *B. abortus* expressing  
255 mCherry was previously generated from the WT *B. abortus* 2308 parent strain by  
256 integrating mini-Tn7 expressing a single copy of *mCherry* at the *glmS* locus. Bacterial  
257 strains used in this study are listed in Table S1.

258

## 259 **Mammalian tissue culture**

260 Prior to each experiment, THP-1 macrophage-like cells were grown to a maximum  
261 density of  $1 \times 10^6 \text{ mL}^{-1}$  in complete RPMI-1640 medium (HyClone) supplemented with  
262 2 mM glutamine (Gibco) and 10% heat-inactivated fetal bovine serum (FBS) (HyClone).  
263 HeLa cells were grown in Dulbecco Modified Eagles Medium (DMEM; HyClone)  
264 supplemented with 10% heat-inactivated FBS. All tissue culture cells were grown at  
265  $37^\circ\text{C}$  in a humidified environment with 5%  $\text{CO}_2$ .

266

## 267 **Mammalian Phenotype MicroArray: mitochondria toxicity**

268 THP-1 cells were seeded at 50,000 cells/well in two half-area 96-well plates in the  
269 presence of  $40 \text{ ng mL}^{-1}$  phorbol myristate acetate (PMA), and allowed to differentiate  
270 for 72 h at  $37^\circ\text{C}$ . *B. abortus* 2308 strain was streaked onto Schaedler blood agar (SBA)  
271 plates before growing for 2 d, re-streaking, and growing for another 2 d. At the day of  
272 infection, *Brucella* cells were scraped off the SBA plate, and suspended and washed in  
273 RPMI-1640 growth medium. Cell concentration was measured by the optical density  
274 method at 600 nm ( $\text{OD}_{600}$ ). Bacteria were added to the last column of a 96-well plate at  
275 1000 MOI, and serially diluted by a factor of two. The first column was left uninfected.  
276 Plates were centrifuged at 2170 rpm for 10 min, followed by a 1-h incubation at  $37^\circ\text{C}$   
277 and 5%  $\text{CO}_2$ . Gentamicin was added to each well at a final concentration of  
278  $100 \mu\text{g mL}^{-1}$  and the plates were further incubated for 1 h. Following incubation, the

279 medium was removed and replaced with fresh medium containing  $25 \mu\text{g mL}^{-1}$   
280 gentamicin. Cells were incubated for 24 h. Twenty-four hours after infection, two PM-M  
281 TOX1 MicroPlates (Biolog) were reconstituted with  $50 \mu\text{L}$  (per well) of MC-0 medium  
282 (Biolog IF-M1 medium,  $0.3 \text{ mM L-Gln}$ ,  $5\%$  dialyzed FBS,  $25 \mu\text{g mL}^{-1}$  gentamicin). The  
283 culture medium was removed from infected cells and replaced with the contents of  
284 reconstituted PM-M TOX1 plates. *Brucella*-infected cells were incubated in the presence  
285 of mitochondrial substrates for another 24 h. Following this incubation,  $10 \mu\text{L}$  of PM-A  
286 dye (Biolog) was added to each well, and the absorbance measured every 15 min (up to  
287 150 min) at 590 nm and 750 nm using a Tecan Infinite 200 PRO microplate reader.  
288 Plates were incubated at  $37^\circ\text{C}$  and  $5\% \text{ CO}_2$  between readings. The collected  
289 absorbance 590 nm data (minus reference absorbance at 750 nm) were analyzed as a  
290 function of time.

291       Following the experiment, cell viability was assessed by removing all liquid from  
292 the PM-M TOX1 plate, replacing it with glucose-supplemented growth medium  
293 containing  $10\%$  FBS, and  $0.5 \text{ mg mL}^{-1}$  MTT reagent, then measuring the absorbance at  
294  $570 \text{ nm}$  after 24 h.

295

### 296 **Mammalian Phenotype MicroArray: utilization of amino acids**

297 THP-1 and *B. abortus* 2308 cells were prepared as described above. The infection  
298 protocol was as described above with small changes. Bacteria were added to  
299 differentiated THP-1 cells in a 96-well plate at 100 MOI. Plates were centrifuged at  
300  $2170 \text{ rpm}$  for 10 min followed by 1-h incubation at  $37^\circ\text{C}$  and  $5\% \text{ CO}_2$ . Gentamicin was

301 added to each well at a final concentration of  $100 \mu\text{g mL}^{-1}$  and plates were further  
302 incubated for 1 h. Following incubation, the medium was removed and replaced with a  
303 fresh medium containing  $25 \mu\text{g mL}^{-1}$  gentamicin. Cells were incubated for 24 h. Twenty-  
304 four hours after infection, the content of the mammalian phenotype microarray PM-M2  
305 (Biolog) was reconstituted with 50  $\mu\text{L}$  (per well) of MC-0 medium (Biolog IF-M1 medium,  
306 0.3 mM L-Gln, 5% dialyzed FBS,  $25 \mu\text{g mL}^{-1}$  gentamicin). The culture medium was  
307 removed from infected cells and replaced with the contents of reconstituted PM-M2  
308 plates. *Brucella*-infected cells were incubated in the presence of various amino acids for  
309 another 24 h. Following this incubation, 10  $\mu\text{L}$  of dye PM-A (Biolog) was added to each  
310 well, and the absorbance was measured every 15 min (up to 120 min) at 590 nm and  
311 750 nm using a Tecan Infinite 200 PRO microplate reader. Plates were incubated at  
312  $37^\circ\text{C}$  and 5%  $\text{CO}_2$  between readings. Absorbance at 590 nm data (minus reference  
313 absorbance at 750 nm) was analyzed as a function of time. Results were analyzed by  
314 hierarchical clustering using Gene Cluster 3.0 and visualized using Java TreeView  
315 (v1.1.6r4).

316

### 317 **Bacterial Phenotype MicroArray**

318 Utilization of glucose, erythritol, and lactic acid was measured using PM as previously  
319 described (35). Briefly, *B. abortus* strains (WT 2308 and  $\Delta\text{bab2\_0315}$ ) were streaked  
320 onto an SBA plate, cultivated at  $37^\circ\text{C}$  and 5%  $\text{CO}_2$  for 48 h, re-streaked, and grown for  
321 another 48 h. Cells were scraped off the plate and resuspended in 1 x IF-0a medium  
322 (Biolog) at a final density equivalent to 5% transmittance ( $\text{OD}_{600\text{nm}}$ ). PM inoculating

323 fluids (PM1 and PM2) were prepared from 0.2- $\mu$ m-filtered and sterilized stock solutions  
324 at the following final concentrations: 2 mM MgCl<sub>2</sub>, 1 mM CaCl<sub>2</sub>, 25  $\mu$ M L-arginine,  
325 50  $\mu$ M L-glutamic acid, 5  $\mu$ M  $\beta$ -NAD, 25  $\mu$ M hypoxanthine, 25  $\mu$ M 5'-UMP, 25  $\mu$ M L-  
326 cystine (pH 8.5), 0.005% yeast extract, and 0.005% Tween 40. PM1 and PM2  
327 inoculating fluids were prepared in 1 x IF-0a GN/GP medium (Biolog). Dye mix G  
328 (Biolog) was added to each solution to a final concentration of 1X. A 1:13.6 dilution of  
329 5% transmittance *Brucella* suspension was added to each inoculating fluid. Per well,  
330 100  $\mu$ L of *Brucella*-containing inoculating fluid was dispensed into each PM plate. PM  
331 plates were incubated at 37°C and 5% CO<sub>2</sub>, and the absorbance at 630 nm was  
332 measured every 24 h for up to 5 d, using a Tecan Infinite 200 PRO microplate reader.

333

### 334 **Imaging of mitochondria**

335 HeLa cells were seeded onto 22 x 22 mm cover slides at 50,000 cells/well in a 6-well  
336 plate in 2 mL of DMEM medium per well. Cells were grown for 24 h prior to infection.  
337 Prior to infection, a culture of *B. abortus* constitutively expressing mCherry was  
338 inoculated in *Brucella* broth, and grown overnight at 37°C on orbital shaker. On the day  
339 of infection, *Brucella* cells were collected, resuspended in DMEM, and opsonized by  
340 incubating for 30 min at 37°C with 1:1000 dilution of serum obtained from *Brucella*-  
341 infected mice, as previously described (36). Following opsonization, cells were washed  
342 and added to HeLa cells at 10,000 MOI. The plate was centrifuged at 2170 rpm for  
343 20 min, and placed for 24 h at 37°C and 5% CO<sub>2</sub>. Following incubation, cells were  
344 washed with DMEM, re-infected at 10,000 MOI, and incubated for another 24 h. After



345 this incubation, cells were washed with DMEM, the cover slide was transferred to a  
346 50 mL tube containing 15 mL DMEM and 200  $\mu\text{g mL}^{-1}$  gentamicin. The slide was  
347 incubated at 37°C and 5% CO<sub>2</sub> for 1 h. Following the incubation, 15  $\mu\text{L}$  of 10 mg  $\text{mL}^{-1}$   
348 Hoechst stain and 2  $\mu\text{L}$  of 1 mM MitoTracker (Molecular Probes) dye were added and  
349 incubated for another 20 min. The cover slide was washed and placed on a microscope  
350 slide with cells facing up. A drop of DMEM was placed on top of the cover slide and  
351 covered by another 22 x 22 mm cover slide. To prevent medium evaporation, the edges  
352 were quickly sealed with nail polish, and live cells were immediately imaged using a  
353 Leica-DMI6000B fluorescence microscope equipped with a HC PL APO 63X/1.4 NA Oil  
354 PH3 CS2 objective. Images were captured using Leica Application Suite X and  
355 Hamamatsu Orca-R2 camera.

### 356 **Quantification of lactic acid**

357 Intracellular lactic acid levels were quantified according to the manufacturer's protocol  
358 using a lactate assay kit (Sigma-Aldrich). Briefly, THP-1 cells were seeded and infected  
359 with *B. abortus* at increasing MOI, as described above. Infected cells were incubated for  
360 48 h before quantifying lactate levels. After incubation, cells were washed with PBS,  
361 homogenized in 60  $\mu\text{L}$  of lactate assay buffer, and cell debris was removed by  
362 centrifuging at 14,000 *g* for 10 min. Fifty microliters of supernatant was collected from  
363 each sample, and endogenous lactate dehydrogenase was removed by centrifuging  
364 supernatants at 14,000 *g* for 30 min using 10 kDa MWCO Ultra-0.5 mL spin filter  
365 (Amicon). Twenty microliters of lactate assay buffer was added to each sample to bring  
366 the volume up to 50  $\mu\text{L}$ . Fifty microliters of master mix (lactate assay buffer, enzyme

367 mix, and probe) was added to each well, mixed, and incubated in the dark at room  
368 temperature for 30 min before measuring absorbance at 570 nm. Lactate concentration  
369 was calculated based on a standard lactate curve and normalized to the number of cells  
370 per well.

### 371 **Construction of *B. abortus lldD* chromosomal deletion**

372 A chromosomal deletion of *B. abortus lldD* (*bab2\_0315*) was obtained using a double  
373 recombination strategy. Primers used in this study are given in Table S2. The 500 base  
374 pairs upstream (using primers 1775 and 1779) and downstream (using primers 1776  
375 and 1777) of *lldD* were Gibson-cloned into pNPTS138, which was digested with *Bam*HI  
376 and *Hind*III (New England Biolabs). Constructs were validated by DNA sequencing. To  
377 delete *lldD*, the deletion plasmid was transformed into *B. abortus*, and primary  
378 integrants were selected by plating on SBA supplemented with 50  $\mu\text{g mL}^{-1}$  kanamycin  
379 (SBA-Kan). The resulting colonies were grown overnight in *Brucella* broth without  
380 selection and plated on SBA supplemented with 5% sucrose to select for second  
381 crossovers. The resulting colonies were screened for the *lldD* deletion by sequencing  
382 using the sequencing primers 1788/1789.

383 To complement the *lldD* deletion strain, the *lldD* gene plus the 500 bp upstream  
384 and downstream (using primers 1775/1777) were Gibson-cloned into pNPTS138, and  
385 restored at the native site using a two-step recombination strategy as outlined above.

386

387 ***Brucella axenic growth***

388 The concentration of *Brucella* cells (WT 2308 and  $\Delta bab2\_0315$ ) was adjusted to 20%  
389 transmittance at OD<sub>600</sub> and diluted into glucose-containing *Brucella* broth (Difco) at 1:20.  
390 MTT (3-(4,5-dimethylthiazol-2-yl)-2,5-diphenyltetrazolium bromide) reagent was added  
391 to the media to a final concentration of 0.5 mg mL<sup>-1</sup>, and cells were continuously  
392 incubated at 37°C in a Tecan plate reader, taking absorbance readings at 570 nm every  
393 10 min for 72 h.

394

395 ***Brucella axenic growth: compound cytotoxicity***

396 NHI-2 (Sigma-Aldrich), 3-BPA, and 2-dG (Santa Cruz Biotechnology) were freshly  
397 prepared and serially diluted to test concentrations in a half-area 96-well plate in a total  
398 volume of 50  $\mu$ L of PM9 medium (2 mM MgCl<sub>2</sub>• 6H<sub>2</sub>O, 1 mM CaCl<sub>2</sub>• 2H<sub>2</sub>O, 0.005% yeast  
399 extract, 0.005% Tween 40, 2.5 mM D-glucose, 5 mM sodium pyruvate, and 1X Dye Mix  
400 G [Biolog]). WT 2308 *Brucella* was prepared from a plate culture in PM9 medium at  
401 20% transmission at 600 nm optical density, and 50  $\mu$ L was added to each well for a  
402 total volume of 100  $\mu$ L per well. Cells were incubated at 37°C, and absorbance at  
403 630 nm was read every 2 h for 72 h using a Tecan microplate reader.

404

405 **XTT cell viability assay**

406 The cytotoxicity of NHI-2, 3-BPA, and 2-dG to THP-1 cells was assessed using the XTT  
407 cell proliferation and viability assay kit (Roche), according to the supplier's protocol.  
408 Briefly, cells were seeded at 50,000 cells/well. Various concentrations of compounds

409 were added to each well, in triplicate, in the presence of 25  $\mu\text{g mL}^{-1}$  of gentamicin. Cells  
410 were incubated for 72 h before measuring viability using the XTT assay. XTT reagents  
411 were prepared according to the manufacturer's instructions. Following incubation, 50  $\mu\text{L}$   
412 of XTT labeling mixture was added per well, and cells were further incubated for 4 h at  
413 37°C and 5%  $\text{CO}_2$ . Absorbance measurements were collected at 590 nm and 750 nm  
414 (reference wavelength). Final data were expressed as absorbance readings at 590 nm  
415 (minus 750 nm reference absorbance) at the respective compound concentrations.

416

#### 417 **Quantifying *Brucella* infection of THP-1 cells**

418 THP-1 cells were seeded in a black-well, clear-bottom 96-well plate (Costar) at 50,000  
419 cells/well, differentiated with 40  $\text{ng mL}^{-1}$  PMA for 72 h. Two hours before infection, cells  
420 were treated with compounds, and infected with *B. abortus* at 100 MOI, as described  
421 above. Fresh compounds were added back into media containing 25  $\mu\text{g mL}^{-1}$   
422 gentamicin, and cells were further incubated for 72 h. After incubation, cells were  
423 washed three times with 1X PBS, and fixed for 10 min with 4% paraformaldehyde,  
424 followed by three washes with 1X PBS. Cell nuclei were labeled with 1  $\mu\text{g mL}^{-1}$  Hoechst  
425 stain. Cells were imaged using a Leica-DMI6000B fluorescence microscope equipped  
426 with a 20X/0.4 NA objective, Hamamatsu Orca-R2 camera, and Leica Application Suite  
427 X. Forty images were captured in four replicate experiments: ten images per condition  
428 per replicate. Cell Profiler (v2.1.1) was used to measure the number of intracellular  
429 fluorescent Brucellae, and the number of THP-1 nuclei. The effect of the compounds on  
430 *B. abortus* intracellular growth was assessed by calculating the number of bacteria per  
431 cell, represented as a ratio of the total number of bacteria to the total number of nuclei

432 (*Brucella* per THP-1 nucleus) per image, which was calculated as an average of 40  
433 images  $\pm$  standard error of the mean. Statistical significance was determined using one-  
434 way analysis of variance (ANOVA) followed by Dunnett's test.

435 To enumerate CFU at 1, 24, and 48 hours post-infection of THP-1, *B. abortus*  
436 cells were resuspended in warmed RPMI and added at a multiplicity of infection (MOI)  
437 of 100 CFU per macrophage cell. To synchronize infections after the addition of  
438 *Brucella* cells, plates were centrifuged at 200 x *g* for 5 minutes. After a 30-minute  
439 incubation, media was removed and replaced with RPMI supplemented with 100  $\mu\text{g mL}^{-1}$   
440 gentamycin to kill extracellular bacteria. Afterwards, samples were incubated for 1  
441 hour, after which monolayers were washed with PBS and THP-1 cells were lysed by  
442 addition of 0.01% Triton X-100. Serial dilutions were prepared and viable cells were  
443 determined by plating on TSA plates. For longer time points, the RPMI was removed,  
444 and replaced with RPMI supplemented with 50  $\mu\text{g mL}^{-1}$  gentamycin. Additional samples  
445 were lysed as above and serial dilutions plated. All THP-1 assays were performed in  
446 triplicate utilizing independent *B. abortus* cultures.

447

#### 448 **ACKNOWLEDGEMENTS**

449 We acknowledge the support staff of the Howard Taylor Ricketts Regional  
450 Biocontainment Laboratory. We also acknowledge and thank Barry Bochner and Aretha  
451 Fiebig for thoughtful feedback and critical evaluation of the manuscript. This study was  
452 funded in part by National Institutes of Health grant R01AI107159 to SC, and the

453 Chicago Biomedical Consortium with support from the Searle Funds at the Chicago  
454 Community Trust.

455

456 **AUTHOR CONTRIBUTIONS**

457 DC and SC conceived and designed the experiments, analyzed the data, and wrote the  
458 manuscript. DC and JW performed the experiments. All authors reviewed and approved  
459 the final manuscript.

460

461 **REFERENCES**

- 462 1. **Galvan-Pena S, O'Neill LA.** 2014. Metabolic reprogramming in macrophage  
463 polarization. *Front Immunol* **5**:420.
- 464 2. **Pearce EL, Pearce EJ.** 2013. Metabolic pathways in immune cell activation and  
465 quiescence. *Immunity* **38**:633-643.
- 466 3. **Kelly B, O'Neill LA.** 2015. Metabolic reprogramming in macrophages and  
467 dendritic cells in innate immunity. *Cell Res* **25**:771-784.
- 468 4. **Warburg O, Wind F, Negelein E.** 1927. The metabolism of tumors in the body. *J*  
469 *Gen Physiol* **8**:519-530.
- 470 5. **Bedard K, Krause KH.** 2007. The NOX Family of ROS-Generating NADPH  
471 Oxidases: Physiology and Pathophysiology. *Physiol Rev* **87**:245-313.
- 472 6. **Nathan CF, Hibbs JB.** 1991. Role of nitric oxide synthesis in macrophage  
473 antimicrobial activity. *Curr Opin Immunol* **3**:65-70.
- 474 7. **Luckhart S, Pakpour N, Giulivi C.** 2015. Host-pathogen interactions in malaria:  
475 cross-kingdom signaling and mitochondrial regulation. *Curr Opin Immunol* **36**:73-  
476 79.
- 477 8. **Koshiba T.** 2013. Mitochondrial-mediated antiviral immunity. *Biochim Biophys*  
478 *Acta* **1833**:225-232.
- 479 9. **Li T, Xu Y, Liu L, Huang M, Wang Z, Tong Z, Zhang H, Guo F, Chen C.** 2016.  
480 *Brucella Melitensis* 16M Regulates the Effect of AIR Domain on Inflammatory  
481 Factors, Autophagy, and Apoptosis in Mouse Macrophage through the ROS  
482 Signaling Pathway. *PLoS One* **11**:e0167486.

- 483 10. **Stavru F, Bouillaud F, Sartori A, Ricquier D, Cossart P.** 2011. *Listeria*  
484 *monocytogenes* transiently alters mitochondrial dynamics during infection. Proc  
485 Natl Acad Sci U S A **108**:3612-3617.
- 486 11. **Owen OE, Kalhan SC, Hanson RW.** 2002. The Key Role of Anaplerosis and  
487 Cataplerosis for Citric Acid Cycle Function. J Biol Chem **277**:30409-30412.
- 488 12. **Xavier MN, Winter MG, Spees AM, den Hartigh AB, Nguyen K, Roux CM,**  
489 **Silva TMA, Atluri VL, Kerrinnes T, Keestra AM, Monack DM, Luciw PA,**  
490 **Eigenheer RA, Bäumlner AJ, Santos RL, Tsolis RM.** 2013. PPAR $\gamma$ -Mediated  
491 Increase in Glucose Availability Sustains Chronic *Brucella abortus* Infection in  
492 Alternatively Activated Macrophages. Cell Host Microbe **14**:159-170.
- 493 13. **Roop RM, Caswell CC.** 2013. Bacterial Persistence: Finding the “Sweet Spot”.  
494 Cell Host Microbe **14**:119-120.
- 495 14. **Eisele NA, Ruby T, Jacobson A, Manzanillo PS, Cox JS, Lam L, Mukundan**  
496 **L, Chawla A, Monack DM.** 2013. *Salmonella* Require the Fatty Acid Regulator  
497 PPAR $\delta$  for the Establishment of a Metabolic Environment Essential for Long-  
498 Term Persistence. Cell Host Microbe **14**:171-182.
- 499 15. **Cardaci S, Desideri E, Ciriolo MR.** 2012. Targeting aerobic glycolysis: 3-  
500 bromopyruvate as a promising anticancer drug. J Bioenerg Biomembr **44**:17-29.
- 501 16. **Ko YH, Smith BL, Wang Y, Pomper MG, Rini DA, Torbenson MS, Hullihen J,**  
502 **Pedersen PL.** 2004. Advanced cancers: eradication in all cases using 3-  
503 bromopyruvate therapy to deplete ATP. Biochem Biophys Res Comm **324**:269-  
504 275.



- 505 17. **Granchi C, Calvaresi EC, Tuccinardi T, Paterni I, Macchia M, Martinelli A,**  
506 **Hergenrother PJ, Minutolo F.** 2013. Assessing the differential action on cancer  
507 cells of LDH-A inhibitors based on the N-hydroxyindole-2-carboxylate (NHI) and  
508 malonic (Mal) scaffolds. *Org Biomol Chem* **11**:10.1039/c1033ob40870a.
- 509 18. **Calvaresi EC, Granchi C, Tuccinardi T, Di Bussolo V, Huigens RW, Lee HY,**  
510 **Palchadhuri R, Macchia M, Martinelli A, Minutolo F, Hergenrother PJ.** 2013.  
511 Dual Targeting of the Warburg Effect with a Glucose-Conjugated Lactate  
512 Dehydrogenase Inhibitor. *Chembiochem* **14**:2263-2267.
- 513 19. **Wick AN, Drury DR, Nakada HI, Wolfe JB.** 1957. Localization of the primary  
514 metabolic block produced by 2-deoxyglucose. *J Biol Chem* **224**:963-969.
- 515 20. **Bochner BR, Siri M, Huang RH, Noble S, Lei XH, Clemons PA, Wagner BK.**  
516 2011. Assay of the multiple energy-producing pathways of mammalian cells.  
517 *PLoS One* **6**:e18147.
- 518 21. **He Y, Reichow S, Ramamoorthy S, Ding X, Lathigra R, Craig JC, Sobral BW,**  
519 **Schurig GG, Sriranganathan N, Boyle SM.** 2006. *Brucella melitensis* triggers  
520 time-dependent modulation of apoptosis and down-regulation of mitochondrion-  
521 associated gene expression in mouse macrophages. *Infect Immun* **74**:5035-  
522 5046.
- 523 22. **Lobet E, Letesson JJ, Arnould T.** 2015. Mitochondria: A target for bacteria.  
524 *Biochem Pharmacol* **94**:173-185.
- 525 23. **Ma C, Wickham ME, Guttman JA, Deng W, Walker J, Madsen KL, Jacobson**  
526 **K, Vogl WA, Finlay BB, Vallance BA.** 2006. *Citrobacter rodentium* infection  
527 causes both mitochondrial dysfunction and intestinal epithelial barrier disruption

- 528 in vivo: role of mitochondrial associated protein (Map). *Cell Microbiol* **8**:1669-  
529 1686.
- 530 24. **Lyamzaev KG, Pletjushkina OY, Saprunova VB, Bakeeva LE, Chernyak BV,**  
531 **Skulachev VP.** 2004. Selective elimination of mitochondria from living cells  
532 induced by inhibitors of bioenergetic functions. *Biochem Soc Trans* **32**:1070-  
533 1071.
- 534 25. **Abu Kwaik Y, Bumann D.** 2015. Host Delivery of Favorite Meals for Intracellular  
535 Pathogens. *PLoS Pathog* **11**:e1004866.
- 536 26. **Mehrotra P, Jamwal SV, Saquib N, Sinha N, Siddiqui Z, Manivel V,**  
537 **Chatterjee S, Rao KV.** 2014. Pathogenicity of *Mycobacterium tuberculosis* is  
538 expressed by regulating metabolic thresholds of the host macrophage. *PLoS*  
539 *Pathog* **10**:e1004265.
- 540 27. **Moulder JW.** 1970. Glucose Metabolism of L Cells Before and After Infection  
541 with *Chlamydia psittaci*. *J Bacteriol* **104**:1189-1196.
- 542 28. **Mehta M, Sonawat HM, Sharma S.** 2005. Malaria parasite-infected erythrocytes  
543 inhibit glucose utilization in uninfected red cells. *FEBS Letters* **579**:6151-6158.
- 544 29. **El-Bacha T, Menezes MMT, Azevedo e Silva MC, Sola-Penna M, Da Poian**  
545 **AT.** 2004. Mayaro virus infection alters glucose metabolism in cultured cells  
546 through activation of the enzyme 6-phosphofructo 1-kinase. *Mol Cell Biochem*  
547 **266**:191-198.
- 548 30. **Anderson JD, Smith H.** 1965. The Metabolism of Erythritol by *Brucella Abortus*.  
549 *J Gen Microbiol* **38**:109-124.

- 550 31. **Smith H, Tang CM, Exley RM.** 2007. Effect of Host Lactate on Gonococci and  
551 Meningococci: New Concepts on the Role of Metabolites in Pathogenicity. *Infect*  
552 *Immun* **75**:4190-4198.
- 553 32. **El Sayed SM, El-Magd RM, Shishido Y, Chung SP, Diem TH, Sakai T,**  
554 **Watanabe H, Kagami S, Fukui K.** 2012. 3-Bromopyruvate antagonizes effects  
555 of lactate and pyruvate, synergizes with citrate and exerts novel anti-glioma  
556 effects. *J Bioenerg Biomembr* **44**:61-79.
- 557 33. **Barban S, Schulze HO.** 1961. The Effects of 2-Deoxyglucose on the Growth and  
558 Metabolism of Cultured Human Cells. *J Biol Chem* **236**:1887-1890.
- 559 34. **Czyz DM, Jain-Gupta N, Shuman HA, Crosson S.** 2016. A dual-targeting  
560 approach to inhibit *Brucella abortus* replication in human cells. *Sci Rep* **6**:35835.
- 561 35. **Herrou J, Czyż DM, Willett JW, Kim HS, Chhor G, Babnigg G, Kim Y,**  
562 **Crosson S.** 2016. WrpA Is an Atypical Flavodoxin Family Protein under  
563 Regulatory Control of the *Brucella abortus* General Stress Response System. *J*  
564 *Bacteriol* **198**:1281-1293.
- 565 36. **Kim HS, Caswell CC, Foreman R, Roop RM, Crosson S.** 2013. The *Brucella*  
566 *abortus* General Stress Response System Regulates Chronic Mammalian  
567 Infection and Is Controlled by Phosphorylation and Proteolysis. *J Biol Chem*  
568 **288**:13906-13916.

569

570

571

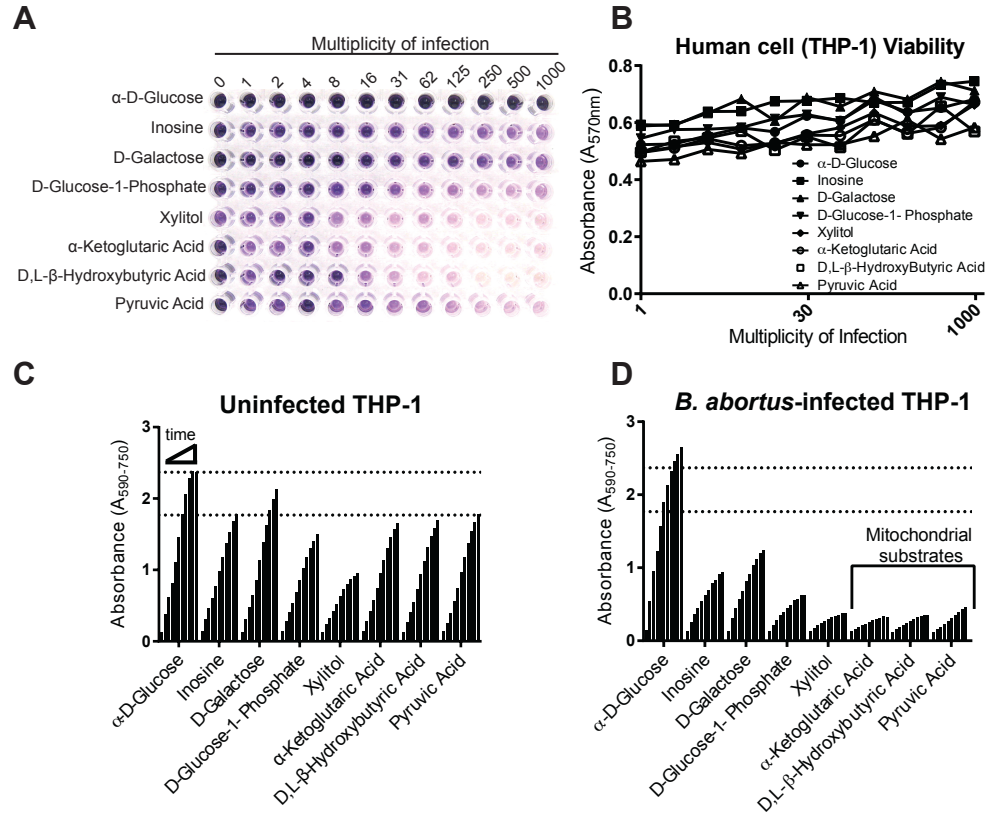

572

573 **FIG 1. Mitochondrial function is perturbed in THP-1 cells infected with *B. abortus*.**

574 **(A)** Mammalian Phenotype MicroArray (PM) plate designed to measure mitochondrial  
 575 function. The ability of THP-1 cells infected with *B. abortus* at increasing multiplicity of  
 576 infection (MOI) to utilize metabolic substrates was assessed by measuring the reduction  
 577 of a tetrazolium dye (see Materials and Methods). **(B)** An MTT cell viability assay was  
 578 performed in the presence of glucose to assess the effect of *B. abortus* infection on  
 579 human cell survival at the conclusion of the mammalian PM assay. Dye reduction by **(C)**  
 580 uninfected and **(D)** *Brucella*-infected human cells (MOI 125) measured as a time-  
 581 dependent absorbance readout. Cells were cultured in minimal medium supplemented  
 582 either with glucose (control) or central metabolic substrates. Brackets indicate  
 583 substrates ( $\alpha$ -ketoglutaric acid,  $\beta$ -hydroxybutyric acid, and pyruvic acid), which enter the

584 mitochondria, thereby providing a direct readout of mitochondrial function. Bars along  
585 the X axes represent time (0–150 min) in 15-min increments. Dotted lines mark the  
586 highest reading for utilization of glucose and pyruvic acid in uninfected THP-1 cells.

587

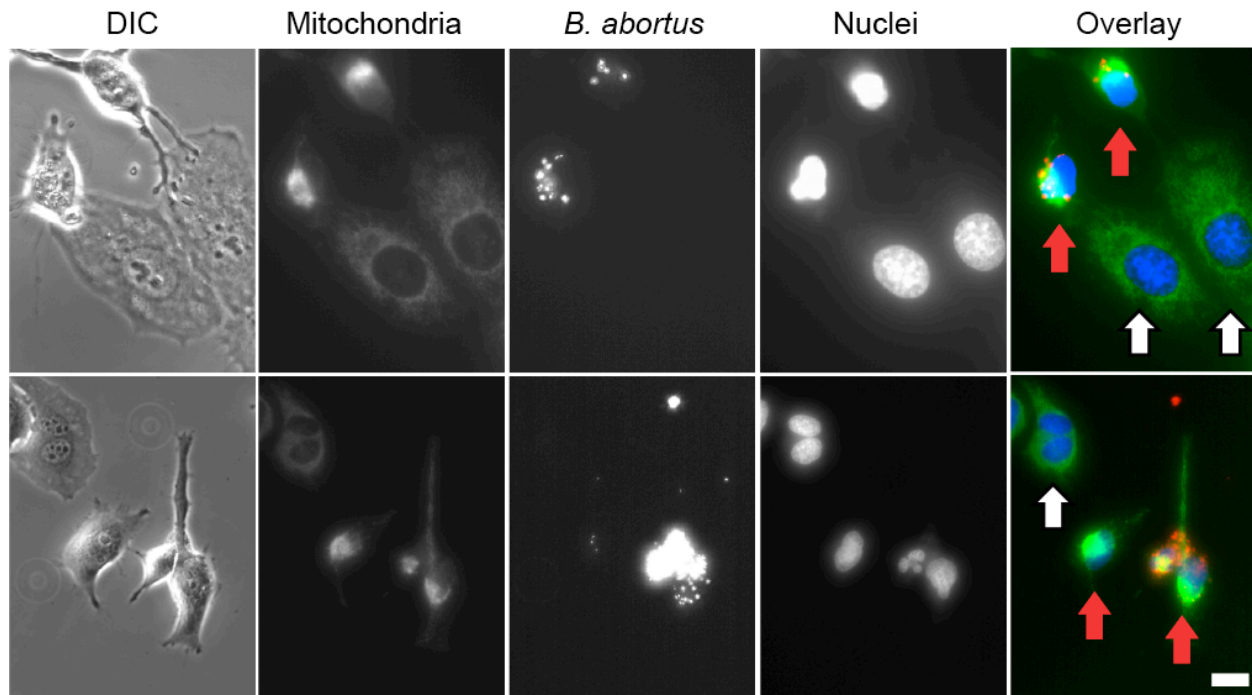

588

589 **FIG 2. Intracellular *B. abortus* induces morphological changes of mitochondria in**  
590 **HeLa cells.**

591 Two fields showing mitochondrial staining (MitoTracker, green), *B. abortus*-Tn7mCherry  
592 (mCherry fluorescence, red), nuclei (Hoechst stain, blue), and the corresponding image  
593 with differential interference contrast (DIC) microscopy. Red arrows indicate cells with  
594 visible intracellular *B. abortus*, white arrows indicate cells for which no infection is  
595 evident. Cells not infected with *B. abortus* have typical morphology and mitochondrial  
596 structure. Scale bar = 50  $\mu$ m.

597

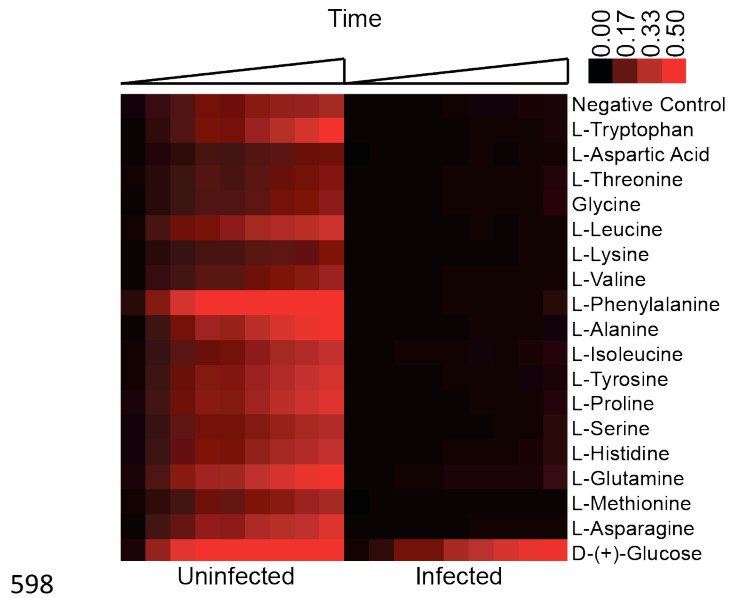

599 **FIG 3. Host cell utilization of amino acids as a carbon source before and after *B.***  
600 ***abortus* infection.**

601 Heatmap representing host cell metabolism as measured colorimetrically via a redox  
602 dye (see Materials and Methods). Time-dependent metabolic change of non-infected  
603 versus *B. abortus*-infected THP-1 cells in the presence of amino acids are plotted. Color  
604 is an arbitrary scale from black (no reduction of the dye, 0.00) to red (maximum  
605 reduction of the dye, 0.50).

606

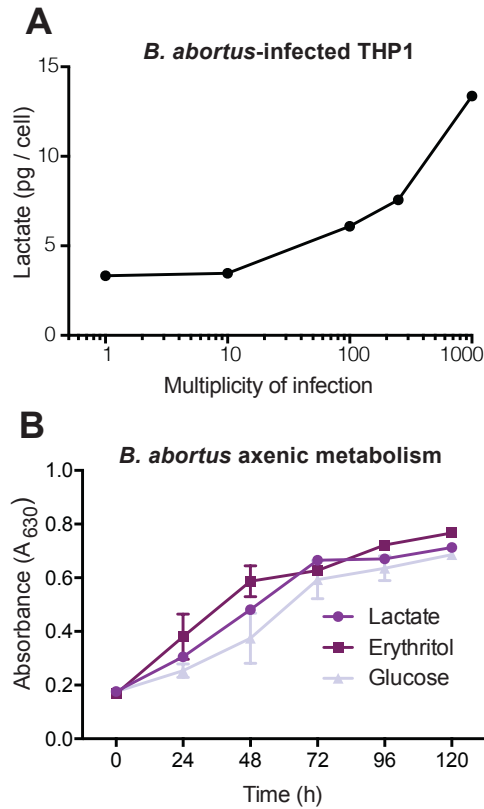

607

608 **FIG 4. *B. abortus* induces host cell lactate production and utilizes lactate as a**  
609 **carbon and energy source as efficiently as glucose and erythritol.**

610 **(A)** Lactate levels in THP-1 cells upon infection with *B. abortus* at different multiplicities  
611 of infection. **(B)** Metabolism of *B. abortus* measured on carbon/energy sources lactate,  
612 erythritol, or glucose. Data show an average of two independent experiments  $\pm$   
613 standard deviation.

614



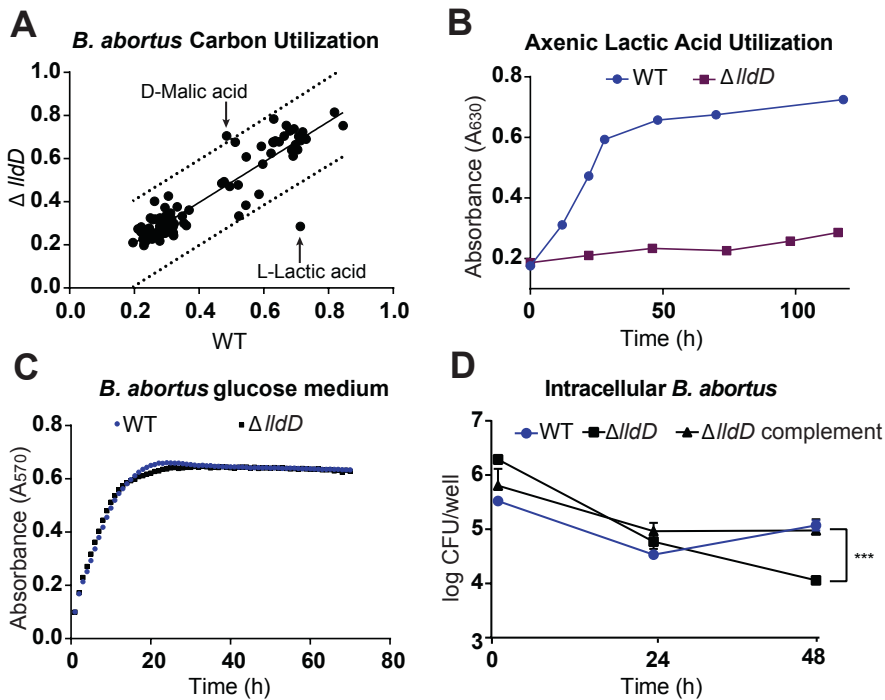

615

616 **FIG 5. *B. abortus* L-lactate dehydrogenase deletion strain  $\Delta$ lldD cannot utilize**  
617 **lactic acid in axenic culture and is attenuated in a macrophage infection model.**

618 **(A)** Phenotype MicroArray carbon utilization measurements of wild-type (WT) *B. abortus*  
619 and L-lactate dehydrogenase (LDH) mutant ( $\Delta$ lldD) strains. Metabolic activities for  
620 growth on 95 distinct carbon substrates (see Materials and Methods) are plotted against  
621 each other; the dotted line marks a 99% prediction band of a linear regression.  
622 Correlation values above the line represent a gain-of-function phenotype and values  
623 below the line represent a loss-of-function phenotype. L-lactic acid and D-malic acid are  
624 marked as loss-of-function and gain-of-function, respectively **(B)** Graph representing  
625 time-dependent utilization of lactic acid as a carbon energy source, and measured by a  
626 metabolic indicator dye (see Materials and Methods). **(C)** Graph representing axenic  
627 growth of the WT and  $\Delta$ lldD strains in glucose-containing *Brucella* broth. **(D)** Intracellular

628 replication of the WT and  $\Delta lldD$  strains in macrophage cell infection model. Intracellular  
629 Brucellae were quantified as  $\log_{10}$  colony forming units (CFU) per well at 1, 24, and 48 h  
630 post-infection. Lines represent WT (●),  $\Delta lldD$  mutant (■), and complement (▲). n=3,  
631 Error bars represent standard deviation.

632

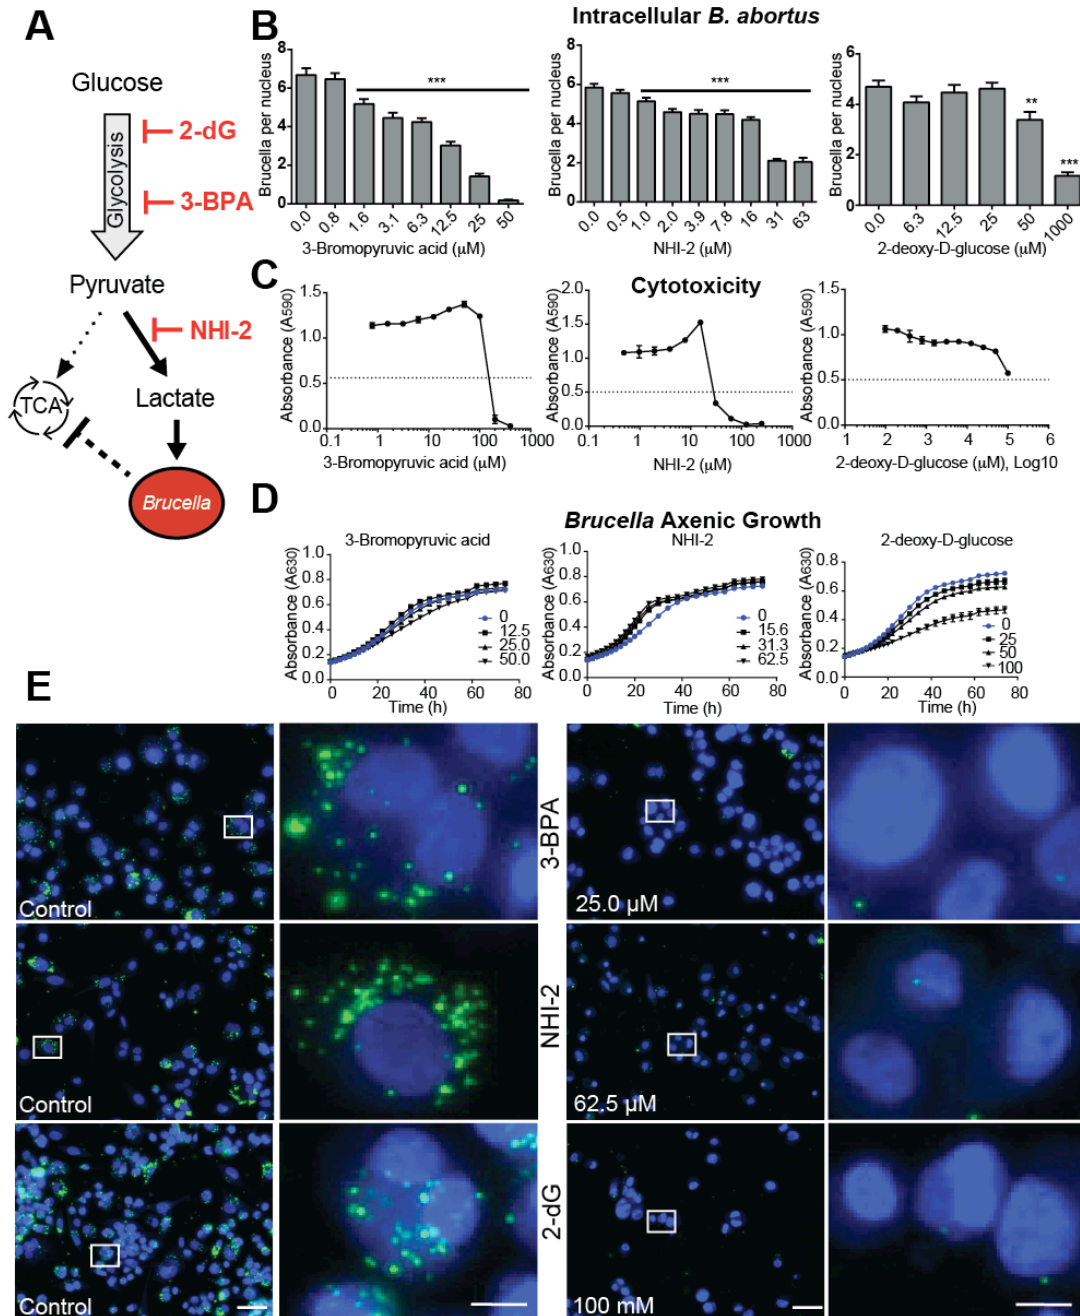

633

634 **FIG 6. Pharmacological disruption of the host glycolytic pathway and lactate**  
 635 **production inhibits replication of intracellular *B. abortus*.**

636 **(A)** Model depicting *Brucella*-dependent modulation of carbon metabolism and  
637 activation of aerobic glycolysis, resulting in the production of lactate. *B. abortus* utilizes  
638 lactate as efficiently as preferred substrates glucose and erythritol. Pharmacological  
639 inhibitors of glycolysis, 3-Bromopyruvic acid (3-BPA), NHI-2, and 2-deoxy-D-glucose (2-  
640 dG), inhibit intracellular growth of *B. abortus*: **(B)** Graphs represent the effect of 3-BPA,  
641 NHI-2, and 2-dG on intracellular replication of *B. abortus* as quantified by enumerating  
642 fluorescent bacteria per THP-1 nucleus; **(C)** cytotoxicity of inhibitory compounds to  
643 THP-1 cells, and **(D)** effect of metabolic inhibitors on *B. abortus* axenic  
644 growth/metabolism. The effect of anti-glycolytic compounds on infection was assessed  
645 by measuring the average ratio of bacteria-to-nuclei in THP-1 cells treated with each of  
646 the compounds. Statistical significance was evaluated from four biological replicates (10  
647 images each) using one-way analysis of variance (ANOVA) followed by Dunnett's post  
648 test (\*\* $p < 0.01$ , \*\*\* $p < 0.0001$ ). Error bars represent  $\pm$  standard deviation from the mean;  
649 an XTT assay was used to measure compound cytotoxicity to THP-1 cells; *Brucella*  
650 axenic growth/metabolism was assayed by measuring tetrazolium-based dye reduction  
651 at 630 nm **(E)** Fluorescence images of nuclei (blue) and intracellular *B. abortus*  
652 (pseudocolored green) reflect the efficacy of 3-BPA, NHI-2, and 2-dG to inhibit *B.*  
653 *abortus* replication in the intracellular niche. Scale bars = 10  $\mu\text{m}$  (full view) and 50  $\mu\text{m}$   
654 (magnified insets, marked with white box in full view). Dotted line = half maximal  
655 inhibitory concentration (IC<sub>50</sub>).

656

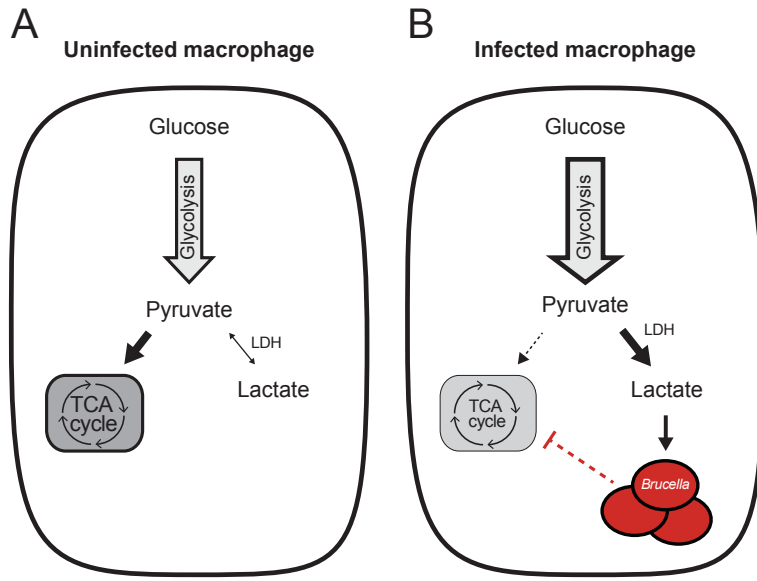

657

658 **FIG 7. Model of how *B. abortus* exploits the shift to Warburg-like metabolism in**  
659 **macrophages.**

660 Data presented in this study support a model in which inhibition of tricarboxylic acid  
661 (TCA) cycle metabolism upon infection biases the host cell toward the production of  
662 lactic acid. **(A)** Uninfected macrophages exhibit typical central carbon metabolism in  
663 which pyruvate enters the TCA cycle. **(B)** *B. abortus* infection biases the macrophage  
664 toward aerobic glycolysis and lactate production. *B. abortus* efficiently utilizes lactic acid  
665 via the lactate dehydrogenase (LDH) enzyme, LldD. A strain lacking *lldD* is  
666 compromised in axenic lactic acid metabolism and in intracellular replication in a THP-1  
667 macrophage model. Pharmacological inhibition of host glycolysis or LDH-A inhibits *B.*  
668 *abortus* replication.
